# Supplementary material for: The Penta-EF-Hand ALG-2 Protein Interacts with the Cytosolic Domain of the SOCE Regulator SARAF and Interferes with Ubiquitination
Source: MDPI journal article supplement (doi:10.3390/ijms21176315), 2020-08-31
Supplement: s1 [file s1]

**Supplementary Table S1.** Summary of ALG-2-interacting protein candidates analyzed in this article. Results of *in vitro* binding assays shown in Figure 1 are summarized. Fragments of proteins containing ABM-2 sequences were expressed and analyzed for binding with Nluc-ALG-2 by Far-western (FW) and pulldown assays.

| Group | Protein name | UniProt ID | Expressed region | ABM-2                 |                  | Intrinsically disordered <sup>c</sup> | Interaction <sup>d</sup> |          |
|-------|--------------|------------|------------------|-----------------------|------------------|---------------------------------------|--------------------------|----------|
|       |              |            |                  | Sequence <sup>a</sup> | PRR <sup>b</sup> |                                       | FW                       | Pulldown |
| A     | Sec31A       | O94979     | 790 - 1095       | 838- <b>PPPPGFI</b>   | y                | Y                                     | ++                       | +++      |
|       | SARAF        | Q96BY9     | 195 - 339        | 223- <b>PPPPGFK</b>   |                  | Y                                     | +++                      | ++       |
|       | SHISA4       | Q96DD7     | 122 - 197        | 153- <b>PPQPGFI</b>   | y                | Y                                     | +                        | +        |
|       | cTAGE5       | O15320     | 502 - 804        | 764- <b>PPRPGFF</b>   | y                | Y                                     | ++                       | +        |
| B     | FNDC3A       | Q9Y2H6     | 59 - 250         | 117- <b>PPLPGFI</b>   | y                |                                       | +                        | +/-      |
|       | DIAPH3       | Q9NSV4     | 550 - 636        | 613- <b>PPPLGFL</b>   | y                |                                       | +/-                      | -        |
| C     | SBF1         | O95248     | 1119 - 1319      | 1313- <b>PPDPGFL</b>  |                  |                                       | -                        | -        |
|       | PIK3R4       | Q99570     | 572 - 1034       | 974- <b>PPPPGWR</b>   |                  |                                       | -                        | -        |
|       | DMRTC2       | Q8IXT2     | 150 - 271        | 206- <b>PPFPGFD</b>   | y                |                                       | -                        | -        |
|       | NR3C2        | P08235     | 1 - 602          | 475- <b>PPVPGFD</b>   |                  |                                       | -                        | -        |
|       | CHRNA1       | P02708     | 342 - 453        | 402- <b>PPPMGFH</b>   |                  |                                       | -                        | -        |
|       | STARD5       | Q9NSY2     | 1 - 213          | 143- <b>PPKPGFV</b>   |                  |                                       | -                        | -        |
|       | CCER1        | Q8TC90     | 1 - 406          | 94- <b>PPPPGFW</b>    |                  |                                       | -                        | -        |

<sup>a</sup> Residues identical with the ABM-2 sequence of Sec31A are shown in bold face.

<sup>b</sup> The letter y indicates that the ABM-2 sequence is contained in a Pro-rich region (PRR) annotated in the

<sup>c</sup> The letter Y indicates that the entire ABM-2 (7 a.a.) and its surrounding sequences on both sides (21 a.a.) are predicted to be located in an intrinsically disordered region (See Supplementary Figure S1).

<sup>d</sup> Relative binding abilities compared to Sec31A are scored and indicated by +++ (very strong), ++ (strong), + (moderate) +/- (weak), and - (negative) in the binding assays by Far Western (FW) and pulldown followed by Nluc-ALG-2 binding.

**Supplementary Table S2.**

| Protein name | UniProt ID | Plasmid source      | Nucleotide Sequence<br>Acc. No. | clone ID          | Expressed region | SGFP2-fusion (vector) | Full or partial | Forward primer                        | Reverse primer                           | Cloning site |
|--------------|------------|---------------------|---------------------------------|-------------------|------------------|-----------------------|-----------------|---------------------------------------|------------------------------------------|--------------|
| CCER1        | Q8TC90     | RIKEN <sup>1)</sup> | BC024183                        | IRAK033D24        | 1-406            | SGFP2-C1              | FL              | ctcaagcttcgaattccatgactcagaccctcgaca  | ccgcggtaccgtcgacctaacagtgtaaagtcctgtgc   | EcoRI/Sall   |
| cTAGE5       | O15320     | RIKEN               | BC064355                        | IRAK134N08        | 502-804          | SGFP2-C1              | P               | ctcaagcttcgaattctccttatgcactcgatgttc  | ccgcggtaccgtcgactgtcaggtttctgtgtgg       | EcoRI/Sall   |
| CHRNA1       | P02708     | NBRC                | AK299445                        | FLJ58615          | 342-453          | SGFP2-C1              | P               | ctcaagcttcgaattccaacacacaccaccgctca   | ccgcggtaccgtcgacctagtccatcaccattgcaacgt  | EcoRI/Sall   |
| DIAPH3       | Q9NSV4     | NBRC <sup>2)</sup>  | AK092024                        | FLJ34705          | 550-636          | SGFP2-C1              | P               | ctcaagcttcgaattctcagtttggtccttgccag   | ccgcggtaccgtcgacctatggtttcaacccaaatggc   | EcoRI/Sall   |
| DMRTC2       | Q8IXT2     | RIKEN               | BC029202                        | IRAK051E15        | 150-271          | SGFP2-C1              | P               | ctcaagcttcgaattcgaactcctgtgggcctctg   | ccgcggtaccgtcgacctatggtctagctgaagagg     | EcoRI/Sall   |
| FNDC3A       | Q9Y2H6     | NBRC                | AK302415                        | FLJ32842          | 59-250           | SGFP2-C1              | P               | ctcaagcttcgaattctggtcctgctcaggttcaa   | ccgcggtaccgtcgactatgtatcaactgtgtaccac    | EcoRI/Sall   |
| NR3C2        | P08235     | NBRC                | AK304318                        | FLJ34705          | 1-481            | SGFP2-C1              | P               | ctcaagcttcgaattcgatggagaccaaaggctac   | ccgcggtaccgtcgacacaccaatcatatctttgaaggtc | EcoRI/Sall   |
| PIK3R4       | Q99570     | OBS <sup>3)</sup>   | BC110318                        | MHS6278-202758656 | 572-1034         | SGFP2-C1              | P               | ctcaagcttcgaattcgaaagccaacgatgtttgttc | ccgcggtaccgtcgacatagatcaggtagtggtggtc    | EcoRI/Sall   |
| SBF1         | O95248     | RIKEN               | BC009268                        | IRAL022F18        | 1119-1596        | SGFP2-C1              | P               | ctcaagcttcgaattcgagcagcctgggtgaaagg   | ccgcggtaccgtcgacctaagtgtagaagtcacac      | EcoRI/Sall   |
| STARD5       | Q9NSY2     | RIKEN               | BC004365                        | IRAL013P20        | 1-213            | SGFP2-C1              | FL              | ctcaagcttcgaattcaatggaccagcactggca    | ccgcggtaccgtcgactagcattactcatggaattg     | EcoRI/Sall   |
| SARAF        | Q96BY9     | OBS                 | BC015012                        | MHS6278-202756988 | 195-339          | SGG-SGFP2-N1          | P               | ctcaagcttcgaattgtcatgagtgacgggcagta   | gcctccgcttgatctcgtctcctgtgtaccaccata     | EcoRI/BamHI  |
| SARAF        | Q96BY9     | OBS                 | BC015012                        | MHS6278-202756988 | 1-339            | SGG-SGFP2-N1          | FL              | ctcaagcttcgaattccatctcatcgagcgccat    | gcctccgcttgatctcgtctcctgtgtaccaccata     | EcoRI/BamHI  |

<sup>1)</sup> Complete sequencing and characterization of 21,243 full-length human cDNAs. Ota T, Suzuki Y, Nishikawa T, Otsuki T, Sugiyama T, et al. Nat Genet. 2004 Jan;36(1):40-5. Epub 2003 Dec 21. PMID: 14702039

<sup>2)</sup> National Institute of Technology and Evaluation (NITE) Biological Resource Center. <https://www.nite.go.jp/nbrc/catalogue/NBRCDispSearchServlet?lang=en>

<sup>3)</sup> Open Biosystems. <https://horizondiscovery.com/en/about-us/about-open-biosystems>
